# Supplementary material for: Functional characterization in Chimonobambusa utilis reveals the role of bHLH gene family in bamboo sheath color variation
Source: Front Plant Sci. 2025 Feb 12;16:1514703. doi: 10.3389/fpls.2025.1514703 (PMC11861543; doi:10.3389/fpls.2025.1514703)
Supplement: Supplementary file 8 [file Table6.xlsx]

## Sheet: Sheet1
Table S6 The information of predict the secondary structure of the CubHLH gene family proteins
ID	ID	Alpha helix	Extended strand	Beta turn	Random coil
TRINITY_DN10077_c0_g1.p1	CubHLH1	0.645	0.0414	0.0118	0.3018
TRINITY_DN35169_c0_g1.p1	CubHLH28	0.5773	0.0567	0.0515	0.3144
TRINITY_DN13611_c0_g1.p1	CubHLH9	0.42	0.15	0.11	0.32
TRINITY_DN21446_c0_g1.p2	CubHLH14	0.4713	0.1437	0.0632	0.3218
TRINITY_DN22872_c0_g1.p1	CubHLH15	0.6126	0.018	0.045	0.3243
TRINITY_DN12518_c0_g1.p2	CubHLH7	0.4974	0.1429	0.0317	0.328
TRINITY_DN36779_c0_g2.p1	CubHLH31	0.5	0.1302	0.0104	0.3594
TRINITY_DN25685_c0_g1.p1	CubHLH17	0.4944	0.1086	0.0225	0.3745
TRINITY_DN24368_c0_g1.p1	CubHLH16	0.4908	0.0871	0.0343	0.3879
TRINITY_DN5229_c0_g1.p2	CubHLH37	0.4713	0.1083	0.0318	0.3885
TRINITY_DN56191_c0_g1.p1	CubHLH39	0.5446	0.0396	0.0099	0.4059
TRINITY_DN10315_c0_g1.p1	CubHLH2	0.5401	0.0365	0.0146	0.4088
TRINITY_DN14687_c0_g1.p1	CubHLH10	0.5105	0.049	0.014	0.4266
TRINITY_DN2875_c0_g1.p1	CubHLH23	0.4384	0.1123	0.0217	0.4275
TRINITY_DN16232_c0_g1.p2	CubHLH11	0.443	0.1141	0.0134	0.4295
TRINITY_DN50700_c0_g1.p1	CubHLH36	0.4452	0.1024	0.019	0.4333
TRINITY_DN29891_c0_g1.p1	CubHLH24	0.4601	0.0798	0.0188	0.4413
TRINITY_DN45422_c0_g1.p2	CubHLH35	0.4458	0.0783	0.0301	0.4458
TRINITY_DN36491_c0_g1.p2	CubHLH30	0.5172	0.0345		0.4483
TRINITY_DN28281_c0_g1.p1	CubHLH22	0.3577	0.1301	0.0407	0.4715
TRINITY_DN19548_c1_g1.p1	CubHLH12	0.4556	0.0386	0.0309	0.4749
TRINITY_DN5559_c0_g1.p3	CubHLH38	0.3964	0.0721	0.045	0.4865
TRINITY_DN8114_c0_g1.p1	CubHLH43	0.3735	0.1024	0.0361	0.488
TRINITY_DN1207_c0_g1.p1	CubHLH5	0.3877	0.0617	0.0573	0.4934
TRINITY_DN12470_c0_g1.p1	CubHLH6	0.3795	0.0821	0.041	0.4974
TRINITY_DN3579_c0_g1.p1	CubHLH29	0.4359	0.047	0.0128	0.5043
TRINITY_DN2019_c0_g1.p1	CubHLH13	0.4071	0.0632	0.0198	0.5099
TRINITY_DN3180_c0_g1.p1	CubHLH25	0.3301	0.123	0.0356	0.5113
TRINITY_DN57380_c0_g1.p1	CubHLH41	0.3684	0.0737	0.0421	0.5158
TRINITY_DN44235_c0_g1.p1	CubHLH33	0.3568	0.0757	0.0486	0.5189
TRINITY_DN26298_c0_g2.p2	CubHLH20	0.3441	0.086	0.043	0.5269
TRINITY_DN11934_c0_g1.p1	CubHLH4	0.361	0.0607	0.0511	0.5272
TRINITY_DN6570_c0_g1.p1	CubHLH42	0.3655	0.084	0.021	0.5294
TRINITY_DN45323_c0_g2.p1	CubHLH34	0.2754	0.1115	0.059	0.5541
TRINITY_DN42477_c0_g1.p1	CubHLH32	0.3042	0.0971	0.0421	0.5566
TRINITY_DN8164_c0_g1.p1	CubHLH44	0.2885	0.1077	0.0404	0.5635
TRINITY_DN11604_c0_g1.p1	CubHLH3	0.3545	0.0522	0.0075	0.5858
TRINITY_DN28280_c0_g1.p1	CubHLH21	0.2857	0.0836	0.0383	0.5923
TRINITY_DN261_c0_g1.p1	CubHLH18	0.3169	0.0458	0.0211	0.6162
TRINITY_DN34063_c0_g1.p1	CubHLH27	0.3198	0.0243	0.0364	0.6194
TRINITY_DN12819_c0_g1.p1	CubHLH8	0.2805	0.0385	0.0294	0.6516
TRINITY_DN573_c0_g1.p1	CubHLH40	0.2643	0.0533	0.0123	0.6701
TRINITY_DN33604_c0_g1.p1	CubHLH26	0.1868	0.1099	0.0275	0.6758
TRINITY_DN26137_c0_g1.p1	CubHLH19	0.1698	0.0896	0.0094	0.7311
